# Supplementary material for: Examining the Differential Role of General and Specific Processing Speed in Predicting Mathematical Achievement in Junior High School
Source: MDPI journal article supplement (doi:10.3390/jintelligence10010001), 2021-12-21
Supplement: s1 [file s1]

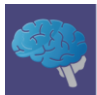

Article

# Examining the Differential Role of General and Specific Processing Speed in Predicting Mathematical Achievement in Junior High School

Dazhi Cheng <sup>1,2,3,4</sup>, Kaihui Shi <sup>1,3</sup>, Naiyi Wang <sup>2</sup>, Xinyang Miao <sup>1,3,4</sup> and Xinlin Zhou <sup>1,3,\*</sup>

<sup>1</sup> State Key Laboratory of Cognitive Neuroscience and Learning, IDG/McGovern Institute for Brain Research, Beijing Normal University, Beijing 100875, China; chengdazhi1015@126.com (D.C.); shikaihui0103@foxmail.com (K.S.); xmiao97@hotmail.com (X.M.)

<sup>2</sup> Lab for Educational Neuroscience, Center for Educational Science and Technology, Faculty of Education, Beijing Normal University, Beijing 100875, China; wangnaiyi@bnu.edu.cn

<sup>3</sup> Advanced Innovation Center for Future Education, Beijing Normal University, Beijing 100875, China

<sup>4</sup> Department of Pediatric Neurology, Capital Institute of Pediatrics, Beijing 100020, China

\* Correspondence: zhou\_xinlin@bnu.edu.cn

**Table S1.** Hierarchical regression models predicting academic achievement in Grades 7 of junior high school considering age, gender, cognitive tests, general processing speed (Choice reaction time).

| Predictors.          | Mathematics .      |                      |                    |                      |                    | Chinese.           |                    |                    |                    |                      | English.             |                    |                    |                    |                    |
|----------------------|--------------------|----------------------|--------------------|----------------------|--------------------|--------------------|--------------------|--------------------|--------------------|----------------------|----------------------|--------------------|--------------------|--------------------|--------------------|
|                      | Step 1             | Step 2               | Step 3             | Step 4               | Step 5             | Step 1             | Step 2             | Step 3             | Step 4             | Step 5               | Step 1               | Step 2             | Step 3             | Step 4             | Step 5             |
|                      | $\beta$            | $\beta$              | $\beta$            | $\beta$              | $\beta$            | $\beta$            | $\beta$            | $\beta$            | $\beta$            | $\beta$              | $\beta$              | $\beta$            | $\beta$            | $\beta$            | $\beta$            |
| Age(months)          | -0.074             | -0.049               | -0.044             | -0.026               | -0.023             | 0.013              | 0.030              | 0.030              | 0.059              | 0.066                | -0.006               | 0.017              | 0.018              | 0.033              | 0.039              |
| Gender               | 0.192*             | 0.173                | 0.198*             | 0.158                | 0.160              | 0.285**            | 0.272**            | 0.279**            | 0.262**            | 0.268**              | 0.371**              | 0.354**            | 0.365**            | 0.322**            | 0.326**            |
| Nonverbal            |                    | 0.340**              | 0.291**            | 0.204*               | 0.195*             |                    | 0.232**            | 0.206*             | 0.136              | 0.117                |                      | 0.308**            | 0.285**            | 0.197*             | 0.183*             |
| matrix reasoning     |                    |                      |                    |                      |                    |                    |                    |                    |                    |                      |                      |                    |                    |                    |                    |
| Mental rotation      |                    |                      | 0.19*              | 0.116                | 0.124              |                    |                    | 0.084              | 0.017              | 0.035                |                      |                    | 0.088              | 0.015              | 0.028              |
| Spatial              |                    |                      | 0.023              | 0.000                | -0.010             |                    |                    | 0.075              | 0.051              | 0.029                |                      |                    | 0.028              | 0.005              | -0.011             |
| working memory       |                    |                      |                    |                      |                    |                    |                    |                    |                    |                      |                      |                    |                    |                    |                    |
| Visual tracing       |                    |                      |                    | 0.184*               | 0.167              |                    |                    |                    | 0.230*             | 0.191                |                      |                    |                    | 0.169              | 0.140              |
| Visual search        |                    |                      |                    | 0.262**              | 0.269**            |                    |                    |                    | 0.138              | 0.153                |                      |                    |                    | 0.274**            | 0.29**             |
| Choice reaction time |                    |                      |                    |                      | -0.092             |                    |                    |                    |                    | -0.209*              |                      |                    |                    |                    | -0.154             |
|                      | $\Delta R^2=0.043$ | $\Delta R^2=0.114^*$ | $\Delta R^2=0.036$ | $\Delta R^2=0.098^*$ | $\Delta R^2=0.008$ | $\Delta R^2=0.081$ | $\Delta R^2=0.053$ | $\Delta R^2=0.015$ | $\Delta R^2=0.068$ | $\Delta R^2=0.041^*$ | $\Delta R^2=0.138^*$ | $\Delta R^2=0.094$ | $\Delta R^2=0.009$ | $\Delta R^2=0.099$ | $\Delta R^2=0.022$ |
|                      |                    | *                    |                    | *                    |                    | **                 | **                 |                    | **                 |                      | *                    | **                 |                    | **                 |                    |

Note: The alpha values are set to 0.05/10 = 0.005, 0.01/10 = 0.001. \* $p < 0.05$ , with Bonferroni correction. \*\* $p < 0.01$ , with Bonferroni correction.

**Table S2.** Hierarchical regression models predicting academic achievement in Grades 7 of junior high school considering age, gender, cognitive tests, general processing speed (Figure matching).

| Predictors                 | Mathematics        |                         |                    |                         |                    | Chinese              |                      |                    |                      |                    | English                 |                      |                    |                      |                    |
|----------------------------|--------------------|-------------------------|--------------------|-------------------------|--------------------|----------------------|----------------------|--------------------|----------------------|--------------------|-------------------------|----------------------|--------------------|----------------------|--------------------|
|                            | Step 1             | Step 2                  | Step 3             | Step 4                  | Step 5             | Step 1               | Step 2               | Step 3             | Step 4               | Step 5             | Step 1                  | Step 2               | Step 3             | Step 4               | Step 5             |
|                            | $\beta$            | $\beta$                 | $\beta$            | $\beta$                 | $\beta$            | $\beta$              | $\beta$              | $\beta$            | $\beta$              | $\beta$            | $\beta$                 | $\beta$              | $\beta$            | $\beta$              | $\beta$            |
| Age(months)                | -0.074             | -0.049                  | -0.044             | -0.026                  | -0.018             | 0.013                | 0.030                | 0.030              | 0.059                | 0.066              | -0.006                  | 0.017                | 0.018              | 0.033                | 0.038              |
| Gender                     | 0.192*             | 0.173                   | 0.198*             | 0.158                   | 0.167              | 0.285**              | 0.272**              | 0.279**            | 0.262**              | 0.271**            | 0.371**                 | 0.354**              | 0.365**            | 0.322**              | 0.327**            |
| Nonverbal matrix reasoning |                    | 0.340**                 | 0.291**            | 0.204*                  | 0.197*             |                      | 0.232**              | 0.206*             | 0.136                | 0.129              |                         | 0.308**              | 0.285**            | 0.197*               | 0.193*             |
| Mental rotation            |                    |                         | 0.19*              | 0.116                   | 0.093              |                      |                      | 0.084              | 0.017                | -0.004             |                         |                      | 0.088              | 0.015                | 0.002              |
| Spatial working memory     |                    |                         | 0.023              | 0.000                   | -0.014             |                      |                      | 0.075              | 0.051                | 0.039              |                         |                      | 0.028              | 0.005                | -0.002             |
| Visual tracing             |                    |                         |                    | 0.184*                  | 0.172              |                      |                      |                    | 0.230*               | 0.219*             |                         |                      |                    | 0.169                | 0.162              |
| Visual search              |                    |                         |                    | 0.262**                 | 0.234**            |                      |                      |                    | 0.138                | 0.113              |                         |                      |                    | 0.274**              | 0.259**            |
| Figure matching            |                    |                         |                    |                         | 0.110              |                      |                      |                    |                      | 0.099              |                         |                      |                    |                      | 0.060              |
|                            | $\Delta R^2=0.043$ | $\Delta R^2=0.114^{**}$ | $\Delta R^2=0.036$ | $\Delta R^2=0.098^{**}$ | $\Delta R^2=0.009$ | $\Delta R^2=0.081^*$ | $\Delta R^2=0.053^*$ | $\Delta R^2=0.015$ | $\Delta R^2=0.068^*$ | $\Delta R^2=0.008$ | $\Delta R^2=0.138^{**}$ | $\Delta R^2=0.094^*$ | $\Delta R^2=0.009$ | $\Delta R^2=0.099^*$ | $\Delta R^2=0.003$ |

Note: The alpha values are set to 0.05/10 = 0.005, 0.01/10 = 0.001. \* $p < 0.05$ , with Bonferroni correction. \*\* $p < 0.01$ , with Bonferroni correction.

**Table S3.** Hierarchical regression models predicting academic achievement in Grades 7 of junior high school considering age, gender, cognitive tests, specific processing speed (Word semantics).

| Predictors                 | Mathematics        |                         |                    |                         |                         | Chinese              |                      |                    |                      |                      | English                 |                      |                    |                      |                      |
|----------------------------|--------------------|-------------------------|--------------------|-------------------------|-------------------------|----------------------|----------------------|--------------------|----------------------|----------------------|-------------------------|----------------------|--------------------|----------------------|----------------------|
|                            | Step 1             | Step 2                  | Step 3             | Step 4                  | Step 5                  | Step 1               | Step 2               | Step 3             | Step 4               | Step 5               | Step 1                  | Step 2               | Step 3             | Step 4               | Step 5               |
|                            | $\beta$            | $\beta$                 | $\beta$            | $\beta$                 | $\beta$                 | $\beta$              | $\beta$              | $\beta$            | $\beta$              | $\beta$              | $\beta$                 | $\beta$              | $\beta$            | $\beta$              | $\beta$              |
| Age(months)                | -0.074             | -0.049                  | -0.044             | -0.026                  | -0.024                  | 0.013                | 0.030                | 0.030              | 0.059                | 0.061                | -0.006                  | 0.017                | 0.018              | 0.033                | 0.035                |
| Gender                     | 0.192*             | 0.173                   | 0.198*             | 0.158                   | 0.097                   | 0.285**              | 0.272**              | 0.279**            | 0.262**              | 0.189*               | 0.371**                 | 0.354**              | 0.365**            | 0.322**              | 0.269**              |
| Nonverbal matrix reasoning |                    | 0.340**                 | 0.291**            | 0.204*                  | 0.168                   |                      | 0.232**              | 0.206*             | 0.136                | 0.093                |                         | 0.308**              | 0.285**            | 0.197*               | 0.166                |
| Mental rotation            |                    |                         | 0.19*              | 0.116                   | 0.105                   |                      |                      | 0.084              | 0.017                | 0.004                |                         |                      | 0.088              | 0.015                | 0.006                |
| Spatial working memory     |                    |                         | 0.023              | 0.000                   | -0.001                  |                      |                      | 0.075              | 0.051                | 0.051                |                         |                      | 0.028              | 0.005                | 0.005                |
| Visual tracing             |                    |                         |                    | 0.184*                  | 0.130                   |                      |                      |                    | 0.230*               | 0.165                |                         |                      |                    | 0.169                | 0.121                |
| Visual search              |                    |                         |                    | 0.262**                 | 0.242**                 |                      |                      |                    | 0.138                | 0.113                |                         |                      |                    | 0.274**              | 0.256**              |
| Word semantics             |                    |                         |                    |                         | 0.258**                 |                      |                      |                    |                      | 0.312**              |                         |                      |                    |                      | 0.226**              |
|                            | $\Delta R^2=0.043$ | $\Delta R^2=0.114^{**}$ | $\Delta R^2=0.036$ | $\Delta R^2=0.098^{**}$ | $\Delta R^2=0.056^{**}$ | $\Delta R^2=0.081^*$ | $\Delta R^2=0.053^*$ | $\Delta R^2=0.015$ | $\Delta R^2=0.068^*$ | $\Delta R^2=0.081^*$ | $\Delta R^2=0.138^{**}$ | $\Delta R^2=0.094^*$ | $\Delta R^2=0.009$ | $\Delta R^2=0.099^*$ | $\Delta R^2=0.043^*$ |
|                            |                    |                         |                    |                         |                         | *                    | *                    |                    | *                    | *                    |                         | *                    |                    | *                    | *                    |

Note: The alpha values are set to  $0.05/10 = 0.005$ ,  $0.01/10 = 0.001$ . \* $p < 0.05$ , with Bonferroni correction. \*\* $p < 0.01$ , with Bonferroni correction.

**Table S4.** Hierarchical regression models predicting academic achievement in Grades 7 of junior high school considering age, gender, cognitive tests, specific processing speed (Simple subtraction).

| Predictors                 | Mathematics        |                         |                    |                         |                         | Chinese              |                      |                    |                      |                      | English                 |                      |                    |                      |                         |
|----------------------------|--------------------|-------------------------|--------------------|-------------------------|-------------------------|----------------------|----------------------|--------------------|----------------------|----------------------|-------------------------|----------------------|--------------------|----------------------|-------------------------|
|                            | Step 1             | Step 2                  | Step 3             | Step 4                  | Step 5                  | Step 1               | Step 2               | Step 3             | Step 4               | Step 5               | Step 1                  | Step 2               | Step 3             | Step 4               | Step 5                  |
|                            | $\beta$            | $\beta$                 | $\beta$            | $\beta$                 | $\beta$                 | $\beta$              | $\beta$              | $\beta$            | $\beta$              | $\beta$              | $\beta$                 | $\beta$              | $\beta$            | $\beta$              | $\beta$                 |
| Age(months)                | -0.074             | -0.049                  | -0.044             | -0.026                  | -0.026                  | 0.013                | 0.030                | 0.030              | 0.059                | 0.059                | -0.006                  | 0.017                | 0.018              | 0.033                | 0.034                   |
| Gender                     | 0.192*             | 0.173                   | 0.198*             | 0.158                   | 0.117                   | 0.285**              | 0.272**              | 0.279**            | 0.262**              | 0.217**              | 0.371**                 | 0.354**              | 0.365**            | 0.322**              | 0.277**                 |
| Nonverbal matrix reasoning |                    | 0.340**                 | 0.291**            | 0.204*                  | 0.167*                  |                      | 0.232**              | 0.206*             | 0.136                | 0.094                |                         | 0.308**              | 0.285**            | 0.197*               | 0.157                   |
| Mental rotation            |                    |                         | 0.19*              | 0.116                   | 0.108                   |                      |                      | 0.084              | 0.017                | 0.008                |                         |                      | 0.088              | 0.015                | 0.007                   |
| Spatial working memory     |                    |                         | 0.023              | 0.000                   | -0.017                  |                      |                      | 0.075              | 0.051                | 0.033                |                         |                      | 0.028              | 0.005                | -0.013                  |
| Visual tracing             |                    |                         |                    | 0.184*                  | 0.165                   |                      |                      |                    | 0.230*               | 0.209                |                         |                      |                    | 0.169                | 0.148                   |
| Visual search              |                    |                         |                    | 0.262**                 | 0.167                   |                      |                      |                    | 0.138                | 0.031*               |                         |                      |                    | 0.274**              | 0.169*                  |
| Simple subtraction         |                    |                         |                    |                         | 0.300**                 |                      |                      |                    |                      | 0.338**              |                         |                      |                    |                      | 0.332**                 |
|                            | $\Delta R^2=0.043$ | $\Delta R^2=0.114^{**}$ | $\Delta R^2=0.036$ | $\Delta R^2=0.098^{**}$ | $\Delta R^2=0.072^{**}$ | $\Delta R^2=0.081^*$ | $\Delta R^2=0.053^*$ | $\Delta R^2=0.015$ | $\Delta R^2=0.068^*$ | $\Delta R^2=0.091^*$ | $\Delta R^2=0.138^{**}$ | $\Delta R^2=0.094^*$ | $\Delta R^2=0.009$ | $\Delta R^2=0.099^*$ | $\Delta R^2=0.088^{**}$ |

Note: The alpha values are set to 0.05/10 = 0.005, 0.01/10 = 0.001. \* $p < 0.05$ , with Bonferroni correction. \*\* $p < 0.01$ , with Bonferroni correction.

**Table S5.** Hierarchical regression models predicting academic achievement in Grades 7 of junior high school considering age, gender, cognitive tests, specific processing speed (Complex subtraction).

| Predictors                 | Mathematics        |                      |                    |                      |                      | Chinese              |                      |                    |                      |                      | English              |                      |                    |                      |                      |
|----------------------------|--------------------|----------------------|--------------------|----------------------|----------------------|----------------------|----------------------|--------------------|----------------------|----------------------|----------------------|----------------------|--------------------|----------------------|----------------------|
|                            | Step 1             | Step 2               | Step 3             | Step 4               | Step 5               | Step 1               | Step 2               | Step 3             | Step 4               | Step 5               | Step 1               | Step 2               | Step 3             | Step 4               | Step 5               |
|                            | $\beta$            | $\beta$              | $\beta$            | $\beta$              | $\beta$              | $\beta$              | $\beta$              | $\beta$            | $\beta$              | $\beta$              | $\beta$              | $\beta$              | $\beta$            | $\beta$              | $\beta$              |
| Age(months)                | -0.07              | -0.05                | -0.04              | -0.03                | -0.02                | 0.01                 | 0.03                 | 0.03               | 0.06                 | 0.07                 | -0.01                | 0.02                 | 0.02               | 0.03                 | 0.04                 |
| Gender                     | 0.192*             | 0.17                 | 0.198*             | 0.16                 | 0.13                 | 0.285**              | 0.272**              | 0.279**            | 0.262**              | 0.237**              | 0.371**              | 0.354**              | 0.365**            | 0.322**              | 0.295**              |
| Nonverbal matrix reasoning |                    | 0.340**              | 0.291**            | 0.204*               | 0.188*               |                      | 0.232**              | 0.206*             | 0.14                 | 0.12                 |                      | 0.308**              | 0.285**            | 0.197*               | 0.179*               |
| Mental rotation            |                    |                      | 0.19*              | 0.12                 | 0.12                 |                      |                      | 0.08               | 0.02                 | 0.02                 |                      |                      | 0.09               | 0.01                 | 0.02                 |
| Spatial working memory     |                    |                      | 0.02               | 0.00                 | -0.01                |                      |                      | 0.07               | 0.05                 | 0.04                 |                      |                      | 0.03               | 0.01                 | 0.00                 |
| Visual tracing             |                    |                      |                    | 0.184*               | 0.17                 |                      |                      |                    | 0.230*               | 0.22                 |                      |                      |                    | 0.17                 | 0.15                 |
| Visual search              |                    |                      |                    | 0.262**              | 0.16                 |                      |                      |                    | 0.14                 | 0.03                 |                      |                      |                    | 0.274**              | 0.16                 |
| Complex subtraction        |                    |                      |                    |                      | 0.254**              |                      |                      |                    |                      | 0.267**              |                      |                      |                    |                      | 0.292**              |
|                            | $\Delta R^2=0.043$ | $\Delta R^2=0.114^*$ | $\Delta R^2=0.036$ | $\Delta R^2=0.098^*$ | $\Delta R^2=0.051^*$ | $\Delta R^2=0.081^*$ | $\Delta R^2=0.053^*$ | $\Delta R^2=0.015$ | $\Delta R^2=0.068^*$ | $\Delta R^2=0.057^*$ | $\Delta R^2=0.138^*$ | $\Delta R^2=0.094^*$ | $\Delta R^2=0.009$ | $\Delta R^2=0.099^*$ | $\Delta R^2=0.068^*$ |

Note: The alpha values are set to  $0.05/10 = 0.005$ ,  $0.01/10 = 0.001$ . \* $p < 0.05$ , with Bonferroni correction. \*\* $p < 0.01$ , with Bonferroni correction.

**Table S6.** Hierarchical regression models predicting academic achievement in Grades 7 of junior high school considering age, gender, cognitive tests, specific processing speed (Complex multiplication).

| Predictors                 | Mathematics        |                      |                    |                      |                    | Chinese              |                      |                    |                      |                      | English              |                      |                    |                      |                      |
|----------------------------|--------------------|----------------------|--------------------|----------------------|--------------------|----------------------|----------------------|--------------------|----------------------|----------------------|----------------------|----------------------|--------------------|----------------------|----------------------|
|                            | Step 1             | Step 2               | Step 3             | Step 4               | Step 5             | Step 1               | Step 2               | Step 3             | Step 4               | Step 5               | Step 1               | Step 2               | Step 3             | Step 4               | Step 5               |
|                            | $\beta$            | $\beta$              | $\beta$            | $\beta$              | $\beta$            | $\beta$              | $\beta$              | $\beta$            | $\beta$              | $\beta$              | $\beta$              | $\beta$              | $\beta$            | $\beta$              | $\beta$              |
| Age(months)                | -0.07              | -0.05                | -0.04              | -0.03                | -0.03              | 0.01                 | 0.03                 | 0.03               | 0.06                 | 0.05                 | -0.01                | 0.02                 | 0.02               | 0.03                 | 0.02                 |
| Gender                     | 0.192*             | 0.17                 | 0.198*             | 0.16                 | 0.15               | 0.285**              | 0.272**              | 0.279**            | 0.262**              | 0.253**              | 0.371**              | 0.354**              | 0.365**            | 0.322**              | 0.313**              |
| Nonverbal matrix reasoning |                    | 0.340**              | 0.291**            | 0.204*               | 0.193*             |                      | 0.232**              | 0.206*             | 0.14                 | 0.12                 |                      | 0.308**              | 0.285**            | 0.197*               | 0.18                 |
| Mental rotation            |                    |                      | 0.19*              | 0.12                 | 0.13               |                      |                      | 0.08               | 0.02                 | 0.03                 |                      |                      | 0.09               | 0.01                 | 0.03                 |
| Spatial working memory     |                    |                      | 0.02               | 0.00                 | -0.07              |                      |                      | 0.07               | 0.05                 | -0.04                |                      |                      | 0.03               | 0.01                 | -0.08                |
| Visual tracing             |                    |                      |                    | 0.184*               | 0.17               |                      |                      |                    | 0.230*               | 0.206*               |                      |                      |                    | 0.17                 | 0.14                 |
| Visual search              |                    |                      |                    | 0.262**              | 0.231**            |                      |                      |                    | 0.14                 | 0.10                 |                      |                      |                    | 0.274**              | 0.234**              |
| Complex multiplication     |                    |                      |                    |                      | 0.16               |                      |                      |                    |                      | 0.214*               |                      |                      |                    |                      | 0.211*               |
| n                          | $\Delta R^2=0.043$ | $\Delta R^2=0.114^*$ | $\Delta R^2=0.036$ | $\Delta R^2=0.098^*$ | $\Delta R^2=0.020$ | $\Delta R^2=0.081^*$ | $\Delta R^2=0.053^*$ | $\Delta R^2=0.015$ | $\Delta R^2=0.068^*$ | $\Delta R^2=0.034^*$ | $\Delta R^2=0.138^*$ | $\Delta R^2=0.094^*$ | $\Delta R^2=0.009$ | $\Delta R^2=0.099^*$ | $\Delta R^2=0.033^*$ |

Note: The alpha values are set to  $0.05/10 = 0.005$ ,  $0.01/10 = 0.001$ . \* $p < 0.05$ , with Bonferroni correction. \*\* $p < 0.01$ , with Bonferroni correction.

**Table S7.** Hierarchical regression models predicting academic achievement in Grades 9 of junior high school considering age, gender, cognitive tests, general processing speed (Choice reaction time).

| Predictors                 | Mathematics        |                      |                    |                      |                    | Chinese              |                      |                    |                      |                      | English              |                      |                    |                      |                    |
|----------------------------|--------------------|----------------------|--------------------|----------------------|--------------------|----------------------|----------------------|--------------------|----------------------|----------------------|----------------------|----------------------|--------------------|----------------------|--------------------|
|                            | Step 1             | Step 2               | Step 3             | Step 4               | Step 5             | Step 1               | Step 2               | Step 3             | Step 4               | Step 5               | Step 1               | Step 2               | Step 3             | Step 4               | Step 5             |
|                            | $\beta$            | $\beta$              | $\beta$            | $\beta$              | $\beta$            | $\beta$              | $\beta$              | $\beta$            | $\beta$              | $\beta$              | $\beta$              | $\beta$              | $\beta$            | $\beta$              | $\beta$            |
| Age(months)                | -0.074             | -0.049               | -0.044             | -0.026               | -0.023             | 0.013                | 0.030                | 0.030              | 0.059                | 0.066                | -0.006               | 0.017                | 0.018              | 0.033                | 0.039              |
| Gender                     | 0.192*             | 0.173                | 0.198*             | 0.158                | 0.160              | 0.285**              | 0.272**              | 0.279**            | 0.262**              | 0.268**              | 0.371**              | 0.354**              | 0.365**            | 0.322**              | 0.326**            |
| Nonverbal matrix reasoning |                    | 0.340**              | 0.291**            | 0.204*               | 0.195*             |                      | 0.232**              | 0.206*             | 0.136                | 0.117                |                      | 0.308**              | 0.285**            | 0.197*               | 0.183*             |
| Mental rotation            |                    |                      | 0.19*              | 0.116                | 0.124              |                      |                      | 0.084              | 0.017                | 0.035                |                      |                      | 0.088              | 0.015                | 0.028              |
| Spatial working memory     |                    |                      | 0.023              | 0.000                | -0.010             |                      |                      | 0.075              | 0.051                | 0.029                |                      |                      | 0.028              | 0.005                | -0.011             |
| Visual tracing             |                    |                      |                    | 0.184*               | 0.167              |                      |                      |                    | 0.230*               | 0.191                |                      |                      |                    | 0.169                | 0.140              |
| Visual search              |                    |                      |                    | 0.262**              | 0.269**            |                      |                      |                    | 0.138                | 0.153                |                      |                      |                    | 0.274**              | 0.29**             |
| Choice reaction time       |                    |                      |                    |                      | -0.092             |                      |                      |                    |                      | -0.209*              |                      |                      |                    |                      | -0.154             |
|                            | $\Delta R^2=0.043$ | $\Delta R^2=0.114^*$ | $\Delta R^2=0.036$ | $\Delta R^2=0.098^*$ | $\Delta R^2=0.008$ | $\Delta R^2=0.081^*$ | $\Delta R^2=0.053^*$ | $\Delta R^2=0.015$ | $\Delta R^2=0.068^*$ | $\Delta R^2=0.041^*$ | $\Delta R^2=0.138^*$ | $\Delta R^2=0.094^*$ | $\Delta R^2=0.009$ | $\Delta R^2=0.099^*$ | $\Delta R^2=0.022$ |

Note: The alpha values are set to  $0.05/10 = 0.005$ ,  $0.01/10 = 0.001$ . \* $p < 0.05$ , with Bonferroni correction. \*\* $p < 0.01$ , with Bonferroni correction.



**Table S8.** Hierarchical regression models predicting academic achievement in Grades 9 of junior high school considering age, gender, cognitive tests, general processing speed (Figure matching) .

| Predictors                 | Mathematics        |                         |                    |                         |                    | Chinese              |                      |                    |                      |                    | English                 |                      |                    |                      |                    |
|----------------------------|--------------------|-------------------------|--------------------|-------------------------|--------------------|----------------------|----------------------|--------------------|----------------------|--------------------|-------------------------|----------------------|--------------------|----------------------|--------------------|
|                            | Step 1             | Step 2                  | Step 3             | Step 4                  | Step 5             | Step 1               | Step 2               | Step 3             | Step 4               | Step 5             | Step 1                  | Step 2               | Step 3             | Step 4               | Step 5             |
|                            | $\beta$            | $\beta$                 | $\beta$            | $\beta$                 | $\beta$            | $\beta$              | $\beta$              | $\beta$            | $\beta$              | $\beta$            | $\beta$                 | $\beta$              | $\beta$            | $\beta$              | $\beta$            |
| Age(months)                | -0.074             | -0.049                  | -0.044             | -0.026                  | -0.018             | 0.013                | 0.030                | 0.030              | 0.059                | 0.066              | -0.006                  | 0.017                | 0.018              | 0.033                | 0.038              |
| Gender                     | 0.192*             | 0.173                   | 0.198*             | 0.158                   | 0.167              | 0.285**              | 0.272**              | 0.279**            | 0.262**              | 0.271**            | 0.371**                 | 0.354**              | 0.365**            | 0.322**              | 0.327**            |
| Nonverbal matrix reasoning |                    | 0.340**                 | 0.291**            | 0.204*                  | 0.197*             |                      | 0.232**              | 0.206*             | 0.136                | 0.129              |                         | 0.308**              | 0.285**            | 0.197*               | 0.193*             |
| Mental rotation            |                    |                         | 0.19*              | 0.116                   | 0.093              |                      |                      | 0.084              | 0.017                | -0.004             |                         |                      | 0.088              | 0.015                | 0.002              |
| Spatial working memory     |                    |                         | 0.023              | 0.000                   | -0.014             |                      |                      | 0.075              | 0.051                | 0.039              |                         |                      | 0.028              | 0.005                | -0.002             |
| Visual tracing             |                    |                         |                    | 0.184*                  | 0.172              |                      |                      |                    | 0.230*               | 0.219*             |                         |                      |                    | 0.169                | 0.162              |
| Visual search              |                    |                         |                    | 0.262**                 | 0.234**            |                      |                      |                    | 0.138                | 0.113              |                         |                      |                    | 0.274**              | 0.259**            |
| Figure matching            |                    |                         |                    |                         | 0.110              |                      |                      |                    |                      | 0.099              |                         |                      |                    |                      | 0.060              |
|                            | $\Delta R^2=0.043$ | $\Delta R^2=0.114^{**}$ | $\Delta R^2=0.036$ | $\Delta R^2=0.098^{**}$ | $\Delta R^2=0.009$ | $\Delta R^2=0.081^*$ | $\Delta R^2=0.053^*$ | $\Delta R^2=0.015$ | $\Delta R^2=0.068^*$ | $\Delta R^2=0.008$ | $\Delta R^2=0.138^{**}$ | $\Delta R^2=0.094^*$ | $\Delta R^2=0.009$ | $\Delta R^2=0.099^*$ | $\Delta R^2=0.003$ |
|                            |                    |                         |                    |                         |                    | *                    | *                    |                    | *                    |                    |                         | *                    |                    | *                    |                    |

Note: The alpha values are set to 0.05/10 = 0.005, 0.01/10 = 0.001. \* $p < 0.05$ , with Bonferroni correction. \*\* $p < 0.01$ , with Bonferroni correction.

**Table S9.** Hierarchical regression models predicting academic achievement in Grades 9 of junior high school considering age, gender, cognitive tests, specific processing speed (Word semantics).

| Predictors                 | Mathematics        |                         |                    |                         |                         | Chinese              |                      |                    |                      |                      | English                 |                      |                    |                      |                      |
|----------------------------|--------------------|-------------------------|--------------------|-------------------------|-------------------------|----------------------|----------------------|--------------------|----------------------|----------------------|-------------------------|----------------------|--------------------|----------------------|----------------------|
|                            | Step 1             | Step 2                  | Step 3             | Step 4                  | Step 5                  | Step 1               | Step 2               | Step 3             | Step 4               | Step 5               | Step 1                  | Step 2               | Step 3             | Step 4               | Step 5               |
|                            | $\beta$            | $\beta$                 | $\beta$            | $\beta$                 | $\beta$                 | $\beta$              | $\beta$              | $\beta$            | $\beta$              | $\beta$              | $\beta$                 | $\beta$              | $\beta$            | $\beta$              | $\beta$              |
| Age(months)                | -0.074             | -0.049                  | -0.044             | -0.026                  | -0.024                  | 0.013                | 0.030                | 0.030              | 0.059                | 0.061                | -0.006                  | 0.017                | 0.018              | 0.033                | 0.035                |
| Gender                     | 0.192*             | 0.173                   | 0.198*             | 0.158                   | 0.097                   | 0.285**              | 0.272**              | 0.279**            | 0.262**              | 0.189*               | 0.371**                 | 0.354**              | 0.365**            | 0.322**              | 0.269**              |
| Nonverbal matrix reasoning |                    | 0.340**                 | 0.291**            | 0.204*                  | 0.168                   |                      | 0.232**              | 0.206*             | 0.136                | 0.093                |                         | 0.308**              | 0.285**            | 0.197*               | 0.166                |
| Mental rotation            |                    |                         | 0.19*              | 0.116                   | 0.105                   |                      |                      | 0.084              | 0.017                | 0.004                |                         |                      | 0.088              | 0.015                | 0.006                |
| Spatial working memory     |                    |                         | 0.023              | 0.000                   | -0.001                  |                      |                      | 0.075              | 0.051                | 0.051                |                         |                      | 0.028              | 0.005                | 0.005                |
| Visual tracing             |                    |                         |                    | 0.184*                  | 0.130                   |                      |                      |                    | 0.230*               | 0.165                |                         |                      |                    | 0.169                | 0.121                |
| Visual search              |                    |                         |                    | 0.262**                 | 0.242**                 |                      |                      |                    | 0.138                | 0.113                |                         |                      |                    | 0.274**              | 0.256**              |
| Word semantics             |                    |                         |                    |                         | 0.258**                 |                      |                      |                    |                      | 0.312**              |                         |                      |                    |                      | 0.226**              |
|                            | $\Delta R^2=0.043$ | $\Delta R^2=0.114^{**}$ | $\Delta R^2=0.036$ | $\Delta R^2=0.098^{**}$ | $\Delta R^2=0.056^{**}$ | $\Delta R^2=0.081^*$ | $\Delta R^2=0.053^*$ | $\Delta R^2=0.015$ | $\Delta R^2=0.068^*$ | $\Delta R^2=0.081^*$ | $\Delta R^2=0.138^{**}$ | $\Delta R^2=0.094^*$ | $\Delta R^2=0.009$ | $\Delta R^2=0.099^*$ | $\Delta R^2=0.043^*$ |

Note: The alpha values are set to  $0.05/10 = 0.005$ ,  $0.01/10 = 0.001$ . \* $p < 0.05$ , with Bonferroni correction. \*\* $p < 0.01$ , with Bonferroni correction.

**Table S10.** Hierarchical regression models predicting academic achievement in Grades 9 of junior high school considering age, gender, cognitive tests, specific processing speed (Simple subtraction) .

| Predictors             | Mathematics        |                         |                    |                         |                         | Chinese              |                      |                    |                      |                      | English                 |                      |                    |                      |                         |
|------------------------|--------------------|-------------------------|--------------------|-------------------------|-------------------------|----------------------|----------------------|--------------------|----------------------|----------------------|-------------------------|----------------------|--------------------|----------------------|-------------------------|
|                        | Step 1             | Step 2                  | Step 3             | Step 4                  | Step 5                  | Step 1               | Step 2               | Step 3             | Step 4               | Step 5               | Step 1                  | Step 2               | Step 3             | Step 4               | Step 5                  |
|                        | $\beta$            | $\beta$                 | $\beta$            | $\beta$                 | $\beta$                 | $\beta$              | $\beta$              | $\beta$            | $\beta$              | $\beta$              | $\beta$                 | $\beta$              | $\beta$            | $\beta$              | $\beta$                 |
| Age(months)            | -0.074             | -0.049                  | -0.044             | -0.026                  | -0.026                  | 0.013                | 0.030                | 0.030              | 0.059                | 0.059                | -0.006                  | 0.017                | 0.018              | 0.033                | 0.034                   |
| Gender                 | 0.192*             | 0.173                   | 0.198*             | 0.158                   | 0.117                   | 0.285**              | 0.272**              | 0.279**            | 0.262**              | 0.217**              | 0.371**                 | 0.354**              | 0.365**            | 0.322**              | 0.277**                 |
| Nonverbal              |                    | 0.340**                 | 0.291**            | 0.204*                  | 0.167*                  |                      | 0.232**              | 0.206*             | 0.136                | 0.094                |                         | 0.308**              | 0.285**            | 0.197*               | 0.157                   |
| matrix reasoning       |                    |                         |                    |                         |                         |                      |                      |                    |                      |                      |                         |                      |                    |                      |                         |
| Mental rotation        |                    |                         | 0.19*              | 0.116                   | 0.108                   |                      |                      | 0.084              | 0.017                | 0.008                |                         |                      | 0.088              | 0.015                | 0.007                   |
| Spatial working memory |                    |                         | 0.023              | 0.000                   | -0.017                  |                      |                      | 0.075              | 0.051                | 0.033                |                         |                      | 0.028              | 0.005                | -0.013                  |
| Visual tracing         |                    |                         |                    | 0.184*                  | 0.165                   |                      |                      |                    | 0.230*               | 0.209                |                         |                      |                    | 0.169                | 0.148                   |
| Visual search          |                    |                         |                    | 0.262**                 | 0.167                   |                      |                      |                    | 0.138                | 0.031*               |                         |                      |                    | 0.274**              | 0.169*                  |
| Simple subtraction     |                    |                         |                    |                         | 0.300**                 |                      |                      |                    |                      | 0.338**              |                         |                      |                    |                      | 0.332**                 |
|                        | $\Delta R^2=0.043$ | $\Delta R^2=0.114^{**}$ | $\Delta R^2=0.036$ | $\Delta R^2=0.098^{**}$ | $\Delta R^2=0.072^{**}$ | $\Delta R^2=0.081^*$ | $\Delta R^2=0.053^*$ | $\Delta R^2=0.015$ | $\Delta R^2=0.068^*$ | $\Delta R^2=0.091^*$ | $\Delta R^2=0.138^{**}$ | $\Delta R^2=0.094^*$ | $\Delta R^2=0.009$ | $\Delta R^2=0.099^*$ | $\Delta R^2=0.088^{**}$ |

Note: The alpha values are set to 0.05/10 = 0.005, 0.01/10 = 0.001. \* $p < 0.05$ , with Bonferroni correction. \*\* $p < 0.01$ , with Bonferroni correction.

**Table S11.** Hierarchical regression models predicting academic achievement in Grades 9 of junior high school considering age, gender, cognitive tests, specific processing speed (Complex subtraction) .

| Predictors                 | Mathematics        |                         |                    |                         |                         | Chinese              |                      |                    |                      |                      | English                 |                      |                    |                      |                         |
|----------------------------|--------------------|-------------------------|--------------------|-------------------------|-------------------------|----------------------|----------------------|--------------------|----------------------|----------------------|-------------------------|----------------------|--------------------|----------------------|-------------------------|
|                            | Step 1             | Step 2                  | Step 3             | Step 4                  | Step 5                  | Step 1               | Step 2               | Step 3             | Step 4               | Step 5               | Step 1                  | Step 2               | Step 3             | Step 4               | Step 5                  |
|                            | $\beta$            | $\beta$                 | $\beta$            | $\beta$                 | $\beta$                 | $\beta$              | $\beta$              | $\beta$            | $\beta$              | $\beta$              | $\beta$                 | $\beta$              | $\beta$            | $\beta$              | $\beta$                 |
| Age(months)                | -0.074             | -0.049                  | -0.044             | -0.026                  | -0.017                  | 0.013                | 0.030                | 0.030              | 0.059                | 0.069                | -0.006                  | 0.017                | 0.018              | 0.033                | 0.044                   |
| Gender                     | 0.192*             | 0.173                   | 0.198*             | 0.158                   | 0.134                   | 0.285**              | 0.272**              | 0.279**            | 0.262**              | 0.237**              | 0.371**                 | 0.354**              | 0.365**            | 0.322**              | 0.295**                 |
| Nonverbal matrix reasoning |                    | 0.340**                 | 0.291**            | 0.204*                  | 0.188*                  |                      | 0.232**              | 0.206*             | 0.136                | 0.119                |                         | 0.308**              | 0.285**            | 0.197*               | 0.179*                  |
| Mental rotation            |                    |                         | 0.19*              | 0.116                   | 0.119                   |                      |                      | 0.084              | 0.017                | 0.021                |                         |                      | 0.088              | 0.015                | 0.019                   |
| Spatial working memory     |                    |                         | 0.023              | 0.000                   | -0.007                  |                      |                      | 0.075              | 0.051                | 0.044                |                         |                      | 0.028              | 0.005                | -0.003                  |
| Visual tracing             |                    |                         |                    | 0.184*                  | 0.171                   |                      |                      |                    | 0.230*               | 0.216                |                         |                      |                    | 0.169                | 0.154                   |
| Visual search              |                    |                         |                    | 0.262**                 | 0.162                   |                      |                      |                    | 0.138                | 0.033                |                         |                      |                    | 0.274**              | 0.160                   |
| Complex subtraction        |                    |                         |                    |                         | 0.254**                 |                      |                      |                    |                      | 0.267**              |                         |                      |                    |                      | 0.292**                 |
|                            | $\Delta R^2=0.043$ | $\Delta R^2=0.114^{**}$ | $\Delta R^2=0.036$ | $\Delta R^2=0.098^{**}$ | $\Delta R^2=0.051^{**}$ | $\Delta R^2=0.081^*$ | $\Delta R^2=0.053^*$ | $\Delta R^2=0.015$ | $\Delta R^2=0.068^*$ | $\Delta R^2=0.057^*$ | $\Delta R^2=0.138^{**}$ | $\Delta R^2=0.094^*$ | $\Delta R^2=0.009$ | $\Delta R^2=0.099^*$ | $\Delta R^2=0.068^{**}$ |

Note: The alpha values are set to 0.05/10 = 0.005, 0.01/10 = 0.001. \* $p < 0.05$ , with Bonferroni correction. \*\* $p < 0.01$ , with Bonferroni correction.

**Table S12.** Hierarchical regression models predicting academic achievement in Grades 9 of junior high school considering age, gender, cognitive tests、specific processing speed (Complex multiplication) .

| Predictors                 | Mathematics        |                      |                    |                      |                    | Chinese                 |                         |                    |                         |                      | English              |                         |                    |                         |                      |
|----------------------------|--------------------|----------------------|--------------------|----------------------|--------------------|-------------------------|-------------------------|--------------------|-------------------------|----------------------|----------------------|-------------------------|--------------------|-------------------------|----------------------|
|                            | Step 1             | Step 2               | Step 3             | Step 4               | Step 5             | Step 1                  | Step 2                  | Step 3             | Step 4                  | Step 5               | Step 1               | Step 2                  | Step 3             | Step 4                  | Step 5               |
|                            | $\beta$            | $\beta$              | $\beta$            | $\beta$              | $\beta$            | $\beta$                 | $\beta$                 | $\beta$            | $\beta$                 | $\beta$              | $\beta$              | $\beta$                 | $\beta$            | $\beta$                 | $\beta$              |
| Age(months)                | -0.074             | -0.049               | -0.044             | -0.026               | -0.033             | 0.013                   | 0.030                   | 0.030              | 0.059                   | 0.050                | -0.006               | 0.017                   | 0.018              | 0.033                   | 0.025                |
| Gender                     | 0.192*             | 0.173                | 0.198*             | 0.158                | 0.151              | 0.285**                 | 0.272**                 | 0.279**            | 0.262**                 | 0.253**              | 0.371**              | 0.354**                 | 0.365**            | 0.322**                 | 0.313**              |
| Nonverbal matrix reasoning |                    | 0.340**              | 0.291**            | 0.204*               | 0.193*             |                         | 0.232**                 | 0.206*             | 0.136                   | 0.122                |                      | 0.308**                 | 0.285**            | 0.197*                  | 0.184                |
| Mental rotation            |                    |                      | 0.19*              | 0.116                | 0.129              |                         |                         | 0.084              | 0.017                   | 0.034                |                      |                         | 0.088              | 0.015                   | 0.032                |
| Spatial working memory     |                    |                      | 0.023              | 0.000                | -0.067             |                         |                         | 0.075              | 0.051                   | -0.036               |                      |                         | 0.028              | 0.005                   | -0.081               |
| Visual tracing             |                    |                      |                    | 0.184*               | 0.165              |                         |                         |                    | 0.230*                  | 0.206*               |                      |                         |                    | 0.169                   | 0.145                |
| Visual search              |                    |                      |                    | 0.262**              | 0.231**            |                         |                         |                    | 0.138                   | 0.097                |                      |                         |                    | 0.274**                 | 0.234**              |
| Complex multiplication     |                    |                      |                    |                      | 0.164              |                         |                         |                    |                         | 0.214*               |                      |                         |                    |                         | 0.211*               |
|                            | $\Delta R^2=0.043$ | $\Delta R^2=0.114^*$ | $\Delta R^2=0.036$ | $\Delta R^2=0.098^*$ | $\Delta R^2=0.020$ | $\Delta R^2=0.081^{**}$ | $\Delta R^2=0.053^{**}$ | $\Delta R^2=0.015$ | $\Delta R^2=0.068^{**}$ | $\Delta R^2=0.034^*$ | $\Delta R^2=0.138^*$ | $\Delta R^2=0.094^{**}$ | $\Delta R^2=0.009$ | $\Delta R^2=0.099^{**}$ | $\Delta R^2=0.033^*$ |

Note: The alpha values are set to 0.05/10 = 0.005, 0.01/10 = 0.001. \* $p < 0.05$ , with Bonferroni correction. \*\* $p < 0.01$ , with Bonferroni correction.
